# Supplementary material for: A glycosyl transferase family 43 protein involved in xylan biosynthesis is associated with straw digestibility in Brachypodium distachyon
Source: PubMed Central journal article supplement (PMC5947151; doi:10.1111/nph.15089), 2018-03-25
Supplement: NPH-218-974-s001.pdf [file NPH-218-974-s001.pdf]

**New Phytologist Supporting Information**

Article title: **Mapping Quantitative Trait Loci for straw digestibility in *Brachypodium distachyon* implicates a gene encoding a glycosyl transferase family 43 protein involved in xylan biosynthesis.**

Authors: Caragh Whitehead<sup>1\*</sup>, Francisco J. Ostos Garrido<sup>2\*</sup>, Matthieu Reymond<sup>3</sup>, Rachael Simister<sup>1</sup>, Assaf Distelfeld<sup>4</sup>, Sergio G. Atienza<sup>2</sup>, Fernando Piston<sup>2</sup>, Leonardo D. Gomez<sup>1</sup> and Simon McQueen-Mason<sup>1</sup>.

Article acceptance date: 5 February 2018

The following Supporting Information is available for this article:

**Fig. S1** Sequence and map of the silencing construct.

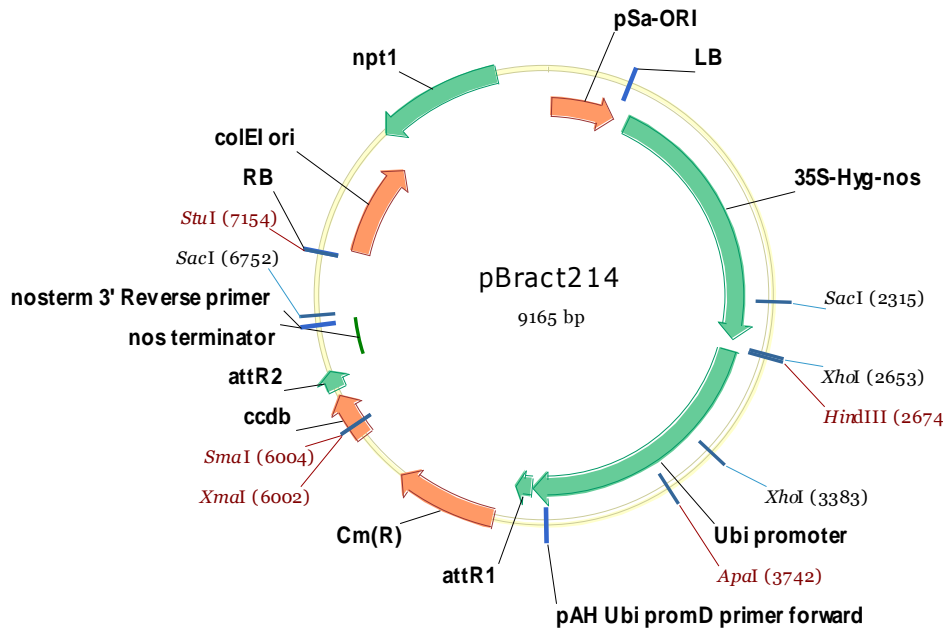

```

1  TTTTATCCC CGGAAGCCTG TGGATAGAGG GTAGTTATCC ACGTGAAACC GCTAATGCC
61  CGCAAAGCCT TGATTCACGG GGCTTTCCGG CCCGCTCAA AACTATCCA CGTGAAATCG
121 CTAATCAGGG TACGTGAAAT CGCTAATCGG AGTACGTGAA ATCGCTAATA AGGTCACGTG
181 AAATCGCTAA TCAAAAAGGC ACGTGAGAAC GCTAATAGCC CTTTCAGATC AACAGCTTGC
241 AAACACCCTT CGCTCCGGCA AGTAGTTACA GCAAGTAGTA TGTTC AATTA GCTTTTCAAT
301 TATGAATATA TATATCAATT ATTGGTCGCC CTTGGCTTGT GGACAATGCG CTACGCGCAC
361 CGGCTCCGCC CGTGGACAAC CGCAAGCGGT TGCCACCGT CGAGCGCCAG CGCCTTTGCC

```

421 CACAACCCGG CGGCCGGCCG CAACAGATCG TTTTATAAAT TTTTTTTTTT GAAAAAGAAA

LB

~

481 AAGCCCGAAA GCGGCAACC TCTCGGGCTT CTGGATTTCC GATCCCCGGA ATTAGATCTT

LB

~~~~~

541 GGCAGGATAT ATTGTGGTGT AACGTATCAC AAGTTGTAC AAAAAAGCAG GCTCCGCGGC

601 CGCCCCCTC ACCTAGACTC GACGCGTCCT AGAGATCCGT CAACATGGTG GAGCACGACA

661 CTCTCGTCTA CTCCAAGAAT ATCAAAGATA CAGTCTCAGA AGACCAAAGG GCTATTGAGA

721 CTTTTCAACA AAGGGTAATA TCGGGAAACC TCCTCGGATT CCATTGCCCA GCTATCTGTC

781 ACTTCATCAA AAGGACAGTA GAAAAGGAAG GTGGCACCTA CAAATGCCAT CATTGCGATA

841 AAGGAAAGGC TATCGTTCAA GATGCCTCTG CCGACAGTGG TCCCAAAGAT GGACCCCCAC

901 CCACGAGGAG CATCGTGGAA AAAGAAGACG TTCCAACCAC GTCTTCAAAG CAAGTGGATT

961 GATGTGATAT CTCCACTGAC GTAAGGGATG ACGCACAATC CCACTATCCT TCGCAAGACC

1021 CTTCCTCTAT ATAAGGAAGT TCATTTTCATT TGGAGAGGAC GACCCCGATA TGAAAAAGCC

1081 TGAACTCACC GCGACGTCTG TCGAGAAGTT TCTGATCGAA AAGTTCGACA GCGTCTCCGA

1141 CCTGATGCAG CTCTCGGAGG GCGAAGAATC TCGTGCTTTC AGCTTCGATG TAGGAGGGCG

1201 TGGATATGTC CTGCGGGTAA ATAGCTGCGC CGATGGTTTC TACAAAGATC GTTATGTTTA

1261 TCGGCACTTT GCATCGGCCG CGCTCCCGAT TCCGGAAGTG CTTGACATTG GGAATTCAG

1321 CGAGAGCCTG ACCTATTGCA TCTCCCGCCG TGCACAGGGT GTCACGTTGC AAGACCTGCC

1381 TGAAACCGAA CTGCCCGCTG TTCTGCAGGT AAATTTCTAG TTTTCTCCT TCATTTTCTT

1441 GGTTAGGACC CTTTTCTCTT TTTATTTTTT TGAGCTTTGA TCTTTCTTTA AACTGATCTA

1501 TTTTTTAATT GATTGGTTAT GGTGTAAATA TTACATAGCT TTAAGTATA ATCTGATTAC

1561 TTTATTTCTG GTGTCTATGA TGATGATGAT AACTGCAGCC GGTCGCGGAG GCCATGGATG

1621 CGATCGCTGC GGCCGATCTT AGCCAGACGA GCGGGTTCGG CCCATTCGGA CCGCAAGGAA

1681 TCGGTCAATA CACTACATGG CGTGATTTCA TATGCGCGAT TGCTGATCCC CATGTGTATC

1741 ACTGGCAAAC TGTGATGGAC GACACCGTCA GTGCGTCCGT CGCGCAGGCT CTCGATGAGC

1801 TGATGCTTTG GGCCGAGGAC TGCCCCGAAG TCCGGCACCT CGTGCACGCG GATTCGGCT

1861 CCAACAATGT CCTGACGGAC AATGGCCGCA TAACAGCGGT CATTGACTGG AGCGAGGCGA

1921 TGTTCGGGGA TTCCCAATC GAGGTCGCCA ACATCTTCTT CTGGAGGCCG TGTTGGCTT

1981 GTATGGAGCA GCAGACGCGC TACTTCGAGC GGAGGCATCC GGAGCTTGCA GGATCGCCGC

2041 GGCTCCGGGC GTATATGCTC CGCATTTGGT TTAGCAACT CTATCAGAGC TTGGTTGAGC

2101 GCAATTTCTGA TGATGCAGCT TGGGCGCAGG GTCGATGCGA CGCAATCGTC CGATCCGGAG  
2161 CCGGGACTGT CGGGCGTACA CAAATCGCCC GCAGAAGCGC GGCCGTCTGG ACCGATGGCT  
2221 GTGTAGAAGT ACTCGCCGAT AGTGGAAACC GACGCCCCAG CACTCGTCCG AGGGCAAAGG

SacI

~~~~~

2281 AATAGAGTAG ATGCCGACCG GGATCCGGAG AGCTCGAATT TCCCCGATCG TTCAAACATT  
2341 TGGCAATAAA GTTCTTAAG ATTGAATCCT GTTGCCGGTC TTGCGATGAT TATCATATAA  
2401 TTTCTGTGA ATTACGTTAA GCATGTAATA ATTAACATGT AATGCATGAC GTTATTTATG  
2461 AGATGGGTTT TTATGATTAG AGTCCCGCAA TTATACATTT AATACGCGAT AGAAAACAAA  
2521 ATATAGCGCG CAAACTAGGA TAAATATATCG CGCGCGGTGT CATCTATGTT ACTAGATCGG  
2581 GAATTCATCG ATGATATCAG ATCAAGGGTG GCGCGCCGA ACCAGCTTTC TTGTACAAAG

XhoI

HindIII

~~~~~

~~~~~

2641 TGGTGATCCC CCTCGAGGTC GACGGTATCG ATAAGCTTGA TATCGAATTC CGTGCAGCGT  
2701 GACCCGGTCG TGCCCTCTC TAGAGATAAT GAGCATTGCA TGTCTAAGTT ATAAAAAATT  
2761 ACCACATATT TTTTTGTCA CACTTGTTTG AAGTGCAGTT TATCTATCTT TATACATATA  
2821 TTTAAACTTT ACTCTACGAA TAATATAATC TATAGTACTA CAATAATATC AGTGTTTTAG  
2881 AGAATCATAT AAATGAACAG TTAGACATGG TCTAAAGGAC AATTGAGTAT TTTGACAACA  
2941 GGACTCTACA GTTTTATCTT TTTAGTGTGC ATGTGTTCTC CTTTTTTTTT GCAAATAGCT  
3001 TCACCTATAT AATACTTCAT CCATTTTATT AGTACATCCA TTTAGGGTTT AGGGTTAATG  
3061 GTTTTTATAG ACTAATTTTT TTAGTACATC TATTTTATTC TATTTTAGCC TCTAAATTAA  
3121 GAAAACATAA ACTCTATTTT AGTTTTTTTA TTAAATAATT TAGATATAAA ATAGAATAAA  
3181 ATAAAGTGAC TAAAAATTAA ACAAATACCC TTTAAGAAAT TAAAAAACT AAGGAAACAT  
3241 TTTTCTTGT TCGAGTAGAT AATGCCAGCC TGTAAACGC CGTCGACGAG TCTAACGGAC  
3301 ACCAACCAGC GAACCAGCAG CGTCGCGTCG GGCCAAGCGA AGCAGACGGC ACGGCATCTC

XhoI

~~~~~

3361 TGTCGCTGCC TCTGGACCCC TCTCGAGAGT TCCGCTCCAC CGTTGGACTT GCTCCGCTGT  
3421 CGGCATCCAG AAATTGCGTG TCGGACGGCA GACGTGAGCC GGCACGGCAG GCGGCCTCCT  
3481 CCTCCTCTCA CGGCACCGGC AGCTACGGGG GATTCCTTTC CCACCGCTCC TTCGCTTTCC  
3541 CTTCTCGCC CGCCGTAATA AATAGACACC CCCTCCACAC CCTCTTTCCC CAACCTCGTG  
3601 TTGTTCGGAG CGCACACACA CACAACCAGA TCTCCCCAA ATCCACCCGT CGGCACCTCC

3661 GCTTCAAGGT ACGCCGCTCG TCCTCCCCC CCCCCCTCT CTACCTTCTC TAGATCGGCG

ApaI

~~~~~

3721 TTCCGGTCCA TGGTTAGGGC CCGGTAGTTC TACTTCTGTT CATGTTTGTG TTAGATCCGT

3781 GTTTGTGTTA GATCCGTGCT GCTAGCGTTC GTACACGGAT GCGACCTGTA CGTCAGACAC

3841 GTTCTGATTG CTAACCTGCC AGTGTTTCTC TTTGGGAAT CCTGGGATGG CTCTAGCCGT

3901 TCCGCAGACG GGATCGATTT CATGATTTTT TTTTGTTCG TTGCATAGGG TTTGGTTTGC

3961 CCTTTCCTT TATTTCAATA TATGCCGTGC ACTTGTGTTG CGGGTCATCT TTTCATGCTT

4021 TTTTTTGTCT TGGTTGTGAT GATGTGGTCT GGTGGGCGG TCGTCTAGA TCGGAGTAGA

4081 ATTAATTCTG TTCAAACCTA CCTGGTGGAT TTATTAATTT TGGATCTGTA TGTGTGTGCC

4141 ATACATATTC ATAGTTACGA ATTGAAGATG ATGGATGGAA ATATCGATCT AGGATAGGTA

4201 TACATGTGTA TGCGGGTTTT ACTGATGCAT ATACAGAGAT GCTTTTTGTT CGCTGGTTG

4261 TGATGATGTG GTGTGGTTGG GCGGTCGTTT ATTCGTTCTA GATCGGAGTA GAATACTGTT

4321 TCAAACCTACC TGGTGTATTT ATTAATTTTG GAACTGTATG TGTGTGTGTCAT ACATCTTCAT

4381 AGTTACGAGT TTAAGATGGA TGGAAATATC GATCTAGGAT AGGTATACAT GTTGATGTGG

4441 GTTTTACTGA TGCATATACA TGATGGCATA TGCAGCATCT ATTCATATGC TCTAACCTTG

4501 AGTACCTATC TATTATAATA AACAAAGTATG TTTTATAATT ATTTTGATCT TGATATACTT

pAH Ubi\_promD primer forward

~~~~~

4561 GGATGATGGC ATATGCAGCA GCTATATGTG GATTTTTTTA GCCCTGCCTT CATACGCTAT

4621 TTATTTGCTT GGTACTGTTT CTTTTGTCGA TGCTCACCCCT GTTGTGTTGGT GTTACTTCGC

4681 CCATCACAAAG TTTGTACAAA AAAGCTGAAC GAGAAACGTA AAATGATATA AATATCAATA

4741 TATTAAATTA GATTTTGCAT AAAAAACAGA CTACATAATA CTGTAAAACA CAACATATCC

4801 AGTCACTATG GCGGCCGCAT TAGGCACCCC AGGCTTTACA CTTTATGCTT CCGGCTCGTA

4861 TAATGTGTGG ATTTTGAGTT AGGATCCGTC GAGATTTTCA GGAGCTAAGG AAGCTAAAAT

4921 GGAGAAAAA ATCACTGGAT ATACCACCGT TGATATATCC CAATGGCATC GTAAAGAACA

4981 TTTTGAGGCA TTTCAGTCAG TTGCTCAATG TACCTATAAC CAGACCGTTC AGCTGGATAT

5041 TACGGCCTTT TTAAAGACCG TAAAGAAAAA TAAGCACAAG TTTTATCCGG CCTTTATTCA

5101 CATTCTTGCC CGCCTGATGA ATGCTCATCC GGAATCCGT ATGGCAATGA AAGACGGTGA

5161 GCTGGTGATA TGGGATAGTG TTCACCCCTG TTACACCGTT TTCCATGAGC AAACCTGAAAC

5221 GTTTTCATCG CTCTGGAGTG AATACCACGA CGATTTCCGG CAGTTTCTAC ACATATATTC

5281 GCAAGATGTG GCGTGTACG GTGAAAACCT GGCCTATTTT CCTAAAGGGT TTATTGAGAA

5341 TATGTTTTTC GTCTCAGCCA ATCCCTGGGT GAGTTTCACC AGTTTTGATT TAAACGTGGC  
5401 CAATATGGAC AACTTCTTCG CCCCCGTTTT CACCATGGGC AAATATTATA CGCAAGGCGA  
5461 CAAGGTGCTG ATGCCGCTGG CGATTGAGT TCATCATGCC GTTTGTGATG GCTTCCATGT  
5521 CGGCAGAAATG CTTAATGAAT TACAACAGTA CTGCGATGAG TGGCAGGGCG GGGCGTAAAC  
5581 GCGTGGATCC GGCTTACTAA AAGCCAGATA ACAGTATGCG TATTGCGCG CTGATTTTTG  
5641 CGGTATAAGA ATATATACTG ATATGTATAC CCGAAGTATG TCAAAAAGAG GTATGCTATG  
5701 AAGCAGCGTA TTACAGTGAC AGTTGACAGC GACAGCTATC AGTTGCTCAA GGCATATATG  
5761 ATGTCAATAT CTCCGGTCTG GTAAGCACAA CCATGCAGAA TGAAGCCCGT CGTCTGCGTG  
5821 CCGAACGCTG GAAAGCGGAA AATCAGGAAG GGATGGCTGA GGTGCCCCG TTTATTGAAA  
5881 TGAACGGCTC TTTTGTGAC GAGAACAGGG GCTGGTGAAA TGCAGTTTAA GGTTTACACC  
5941 TATAAAAGAG AGAGCCGTTA TCGTCTGTTT GTGGATGTAC AGAGTGATAT TATTGACACG

XmaI

~~~~~

SmaI

~~~~~

6001 CCCGGGCGAC GGATGGTGAT CCCCTGGCC AGTGCACGTC TGCTGTCAGA TAAAGTCTCC  
6061 CGTGAACTTT ACCCGTGGT GCATATCGGG GATGAAAGCT GCGCATGAT GACCACCGAT  
6121 ATGGCCAGTG TGCCGGTCTC CGTTATCGGG GAAGAAGTGG CTGATCTCAG CCACCGCGAA  
6181 AATGACATCA AAAACGCCAT TAACCTGATG TTCTGGGGAA TATAAATGTC AGGCTCCCTT  
6241 ATACACAGCC AGTCTGCAGG TCGACCATAG TGAAGGATA TGTGTGTTT TACAGTATTA  
6301 TGTAAGTCTGT TTTTATGCA AAATCTAATT TAATATATTG ATATTTATAT CATTTTACGT  
6361 TTCTCGTTCA GCTTTCTTGT ACAAAGTGGT GATGGGGAT CCACTAGTTC TAGAATTCGA  
6421 TTGAGTCAAG CAGGATCGTT CAAACATTTG GCAATAAAGT TTCTTAAGAT TGAATCCTGT  
6481 TGCCGGTCTT GCGATGATTA TCATATAAAT TCTGTTGAAT TACGTTAAGC ATGTAATAAT  
6541 TAACATGTAA TGCATGACGT TATTTATGAG ATGGGTTTTT ATGATTAGAG TCCCGCAATT  
6601 ATACATTTAA TACGCGATAG AAAACAAAAT ATAGCGCGCA AACTAGGATA AATTATCGCG

noTerm\_3' Reverse primer

~~~~~

6661 CGCGGTGTC TCTATGTTAC TAGATCGACC GGCATGCAAG CTGATATCAA TCACTAGTGA

SacI

~~~~~

6721 ATTCTAGAGC GGCCGCCACC GCGGTGGAGC TCCAGCTTTT GTTCCCTTTA GTGAGGGTTA

6781 ATTGCGCGCT TGGCGTAATC ATGGTCATAG CTGTTTCCTG TGTGAAATTG TTATCCGCTC  
6841 ACAATTCCAC ACAACATACG AGCCGGAAGC ATAAAGTGTA AAGCCTGGGG TGCCTAATGA  
6901 GTGAGCTAAC TCACATTAAT TGCGTGCGC TCACTGCCCG CTTCCAGTC GGGAAACCTG  
6961 TCGTGCCAGC TGCATTAATG AATCGGCCAA CGCGCGGGA GAGGCGGTTT GCGTATTGGG  
7021 CGCTCTTCGG CTTCCTCGCT CACTGACTCG CTGCGCTCGG TCGTTCGGCT GCGGCGAGCG  
7081 GTATCAGCTC ACTCAAAGGC GGTAATACGG TTATCCACAG AATCAGGGGA TAACGCAGGA

RB

~~~~~

StuI

~~~~~

7141 AAGAACATGA AGGCCTTGAC AGGATATATT GCGGGTAAA CTAAGTCGCT GTATGTGTTT  
7201 GTTTGAGATC TCATGTGAGC AAAAGGCCAG CAAAAGGCCA GGAACCGTAA AAAGGCCGCG  
7261 TTGCTGGCGT TTTTCCATAG GCTCCGCCCC CCTGACGAGC ATCACA AAAA TCGACGCTCA  
7321 AGTCAGAGGT GCGGAAACCC GACAGGACTA TAAAGATACC AGGCGTTTCC CCCTGGAAGC  
7381 TCCCTCGTGC GCTCTCCTGT TCCGACCCTG CCGCTTACCG GATACCTGTC CGCCTTTCTC  
7441 CCTTCGGGAA GCGTGGCGCT TTCTCATAGC TCACGCTGTA GGTATCTCAG TTCGGTGTAG  
7501 GTCGTTTCGCT CCAAGCTGGG CTGTGTGCAC GAACCCCGG TTCAGCCCGA CCGCTGCGCC  
7561 TTATCCGGTA ACTATCGTCT TGAGTCCAAC CCGGTAAGAC ACGACTTATC GCCACTGGCA  
7621 GCAGCCACTG GTAACAGGAT TAGCAGAGCG AGGTATGTAG GCGGTGCTAC AGAGTTCTTG  
7681 AAGTGGTGGC CTAACTACGG CTACACTAGA AGAACAGTAT TTGGTATCTG CGCTCTGCTG  
7741 AAGCCAGTTA CCTTCGGAAG AAGAGTTGGT AGCTCTTGAT CCGGCAAACA AACCACCGCT  
7801 GGTAGCGGTG GTTTTTTTGT TTGCAAGCAG CAGATTACGC GCAGAAAAAA AGGATCTCAA  
7861 GAAGATCCTT TGATCTTTTC TACGGGTCT GACGCTCAGT GGAACGAAAA CTCACGTTAA  
7921 GGGATTTTGG TCATGAGATT ATCAAAAAGG ATCTTCACCT AGATCCTTTT AAATTA AAAA  
7981 TGAAGTTTAA AATCAATCTA AAGTATATAT GTGTAACATT GGTCTAGTGA TTAGAAAAAC  
8041 TCATCGAGCA TCAAATGAAA CTGCAATTTA TTCATATCAG GATTATCAAT ACCATATTTT  
8101 TGA AAAAGCC GTTCTGTAA TGAAGGAGAA AACTCACCGA GGCAGTTCCA TAGGATGGCA  
8161 AGATCCTGGT ATCGGTCTGC GATTCCGACT CGTCCAACAT CAATACAACC TATTAATTTT  
8221 CCCTCGTCAA AAATAAGGTT ATCAAGTGAG AAATCACCAT GAGTGACGAC TGAATCCGGT  
8281 GAGAATGGCA AAAGTTTATG CATTCTTTTC CAGACTTGTT CAACAGGCCA GCCATTACGC  
8341 TCGTCATCAA AATCACTCGC ATCAACCAAA CCGTTATTCA TTCGTGATTG CGCCTGAGCG  
8401 AGACGAAATA CGCGATCGCT GTTAAAAGGA CAATTACAAA CAGGAATCGA ATGCAACCGG

8461 CGCAGGAACA CTGCCAGCGC ATCAACAATA TTTTCACCTG AATCAGGATA TTCTTCTAAT  
8521 ACCTGGAATG CTGTTTTCCC TGGGATCGCA GTGGTGAGTA ACCATGCATC ATCAGGAGTA  
8581 CGGATAAAAT GCTTGATGGT CGGAAGAGGC ATAAATCCG TCAGCCAGTT TAGTCTGACC  
8641 ATCTCATCTG TAACAACATT GGCAACGCTA CCTTTGCCAT GTTTCAGAAA CAACTCTGGC  
8701 GCATCGGGCT TCCCATACAA TCGGTAGATT GTCGCACCTG ATTGCCCGAC ATTATCGCGA  
8761 GCCCATTAT ACCCATATAA ATCAGCATCC ATGTTGGAAT TTAATCGCGG CCTTGAGCAA  
8821 GACGTTTCCC GTTGAATATG GCTCATAACA CCCCTGTAT TACTGTTTAT GTAAGCAGAC  
8881 AGTTTTATG TTCATGATGA TATATTTTA TCTTGCGAA TGTAACATCA GAGATTTGA  
8941 GACACAACGT GGCTTTGTTG AATAAATCGA ACTTTTGCTG AGTTGAAGGA TCAGATCAGC  
9001 CATCTTCCCG ACAACGCAGA CCGTTCCGTG GCAAAGCAA AGTCAAAAT CACCAACTGG  
9061 TCCACCTACA ACAAAGCTCT CATCAACCGT GGCTCCCTCA CTTTCTGGCT GGATGATGGG  
9121 GCGATTCAGG CGATCCCCAT CCAACAGCCC GCCGTCGAGC GGGCT

**Fig. S2** Comparison of the Brachypodium parental lines Bd21 and Bd3-1 in terms of (A) germination frequency (B) height, excluding inflorescence (C) total biomass and (D) stem only biomass. The results indicate the mean and +/- SD and Anova indicates that those sharing the same letter are not significantly different.

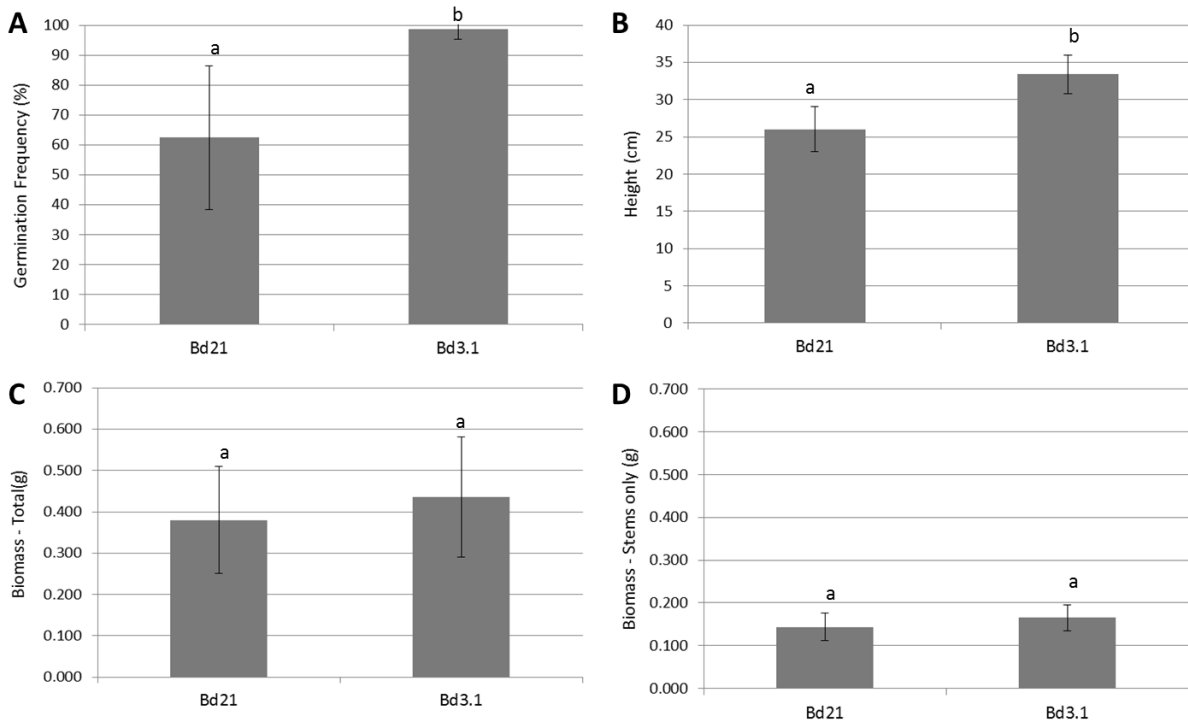



**Fig. S3** Saccharification analysis of Arabidopsis Col.0 and T-DNA line GT43. The results indicate the mean and +/- SD.

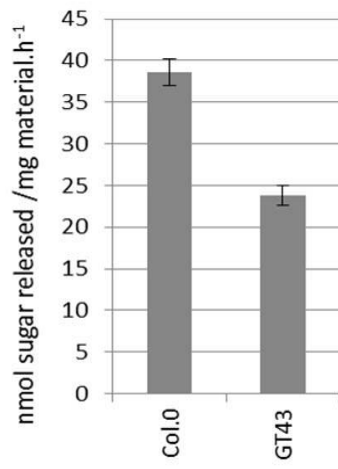

**Table S1** Primers used during construction of the RNAi lines.

| Oligo Name        | Sequence 5' to 3'                         |
|-------------------|-------------------------------------------|
| miR-XS24290A-I    | agTCTTCAGTATTTACTACGCTGcaggagattcagtttga  |
| miR-XS24290A-II   | tgCAGCGTAGTAAATACTGAAGActgctgctgctacagcc  |
| miR*-XS24290A-III | ctCAGCGAAGTTAATACTGAAGAttcctgctgctaggctg  |
| miR*-XS24290A-IV  | aaTCTTCAGTATTAACCTCGCTGagagaggcaaaagtga   |
| miR-XS24290B-I    | agTTCAAATTTCCATACATGCGGcaggagattcagtttga  |
| miR-XS24290B-II   | tgCCGCATGTATGGAAATTTGAAActgctgctgctacagcc |
| miR*-XS24290B-III | ctCCGCAAGTAAGGAAATTTGAAAttcctgctgctaggctg |
| miR*-XS24290B-IV  | aaTTCAAATTTCTTACTTGCGGagagaggcaaaagtga    |
| G-4368            | CTGCAAGGCGATTAAGTTGGGTAAC                 |
| G-4369            | GCGGATAACAATTTACACAGGAAACAG               |

**Table S2** Primers used during qPCR of the RNAi lines.

| Oligo Name   | Direction | Size (bp) | Sequence 5' to 3'       |
|--------------|-----------|-----------|-------------------------|
| SamDC        | Forward   | 190       | TGCTAATCTGCTCCAATGGC    |
|              | Reverse   |           | GACGCAGCTGACCACCTAGA    |
| UBC18        | Forward   | 193       | GGAGGCACCTCAGGTCATTT    |
|              | Reverse   |           | ATAGCGGTCATTGTCTTGCG    |
| Ubi10        | Forward   | 237       | TCCACACTCCAATTGGTGCT    |
|              | Reverse   |           | GAGGGTGGACTCCTTTTGGGA   |
| BraXS90-RT-1 | Forward   | 167       | CACGCCCTCAGGGAGATACG    |
|              | Reverse   |           | AACGACTCCTTGGTGCCTTC    |
| BraXS90-RT-2 | Forward   | 163       | AGTCAAATTTCCCGCATGAATGG |
|              | Reverse   |           | TCGGTGGAGGCTTCACAAAG    |

**Table S3** Genes identified on chromosome 5 around the QTL linked to marker BD1676\_1.

| Gene Name |         | Function                                                                                                         | Pfam                                          | Panther                             |
|-----------|---------|------------------------------------------------------------------------------------------------------------------|-----------------------------------------------|-------------------------------------|
| Bradi5g   | 24160.1 | Motor activity, ATPase activity, Rab GTPase binding                                                              |                                               | GOLGIN-84                           |
|           | 24160.2 | Motor activity, ATPase activity, Rab GTPase binding                                                              |                                               | GOLGIN-84                           |
|           | 24170.1 | Secondary active sulfate transmembrane transporter activity, chloride channel activity, anion exchanger activity | Sulfate transporter family                    | Sulfate transporter                 |
|           | 24170.2 | Secondary active sulfate transmembrane transporter activity, chloride channel activity, anion exchanger activity | Sulfate transporter family                    | Sulfate transporter                 |
|           | 24180.1 | WAK receptor-like protein kinase, expressed, subfamily WAKb                                                      | Protein kinase domain                         |                                     |
|           | 24190.1 | WAK receptor-like protein kinase, expressed, subfamily WAKb                                                      | Protein kinase domain                         |                                     |
|           | 24200.1 | Putative Gene                                                                                                    | Peroxidase                                    |                                     |
|           | 24207.1 | Putative Gene                                                                                                    | Alpha-N-acetylglucosaminidase (NAGLU)         | Alpha-N-acetylglucosaminidase       |
|           | 24220.1 | Transcription corepressor activity, phosphoglycerate dehydrogenase activity                                      |                                               | 2-Hydroxyacid dehydrogenase         |
|           | 24227.1 | Putative Gene                                                                                                    | Asparaginase                                  | Protease T2 asparaginase            |
|           | 24240.1 | Putative Gene                                                                                                    | Sec1 family                                   | Vesicle protein sorting-associated  |
|           | 24250.1 | Single-standed DNA specific 3'-5' exodeoxyribonuclease activity                                                  | Exonuclease                                   | Exonuclease-related                 |
|           | 24257.1 | Putative Gene                                                                                                    | DUF2930                                       |                                     |
|           |         |                                                                                                                  |                                               |                                     |
|           | 24267.1 | Putative Gene                                                                                                    | Dedicator of cytokinesis                      | dedicator of cytokinesis (DOCK)     |
|           | 24280.1 | UDP-galactosyltransferase activity                                                                               | UDP-glucuronosyl and UDP-glucosyl transferase | UDP-glucuronosyltransferase related |

|  |         |                                                                                                     |                                  |                                                 |
|--|---------|-----------------------------------------------------------------------------------------------------|----------------------------------|-------------------------------------------------|
|  | 24290.1 | Putative xylosyltransferase, CAZy family GT43                                                       | Glycosyltransferase family 43    | Beta-1,3-glucuronyltransferase-related          |
|  | 24300.1 | Serine-type carboxypeptidase activity                                                               | Serine carboxypeptidase          | Serine carboxypeptidase II (carboxypeptidase D) |
|  | 24310.1 | WAK receptor-like protein kinase, expressed, subfamily WAKb                                         | Protein kinase domain            |                                                 |
|  | 24320.1 | Putative Gene                                                                                       |                                  |                                                 |
|  | 24330.1 | Putative Gene                                                                                       |                                  |                                                 |
|  | 34340.1 | Putative Gene                                                                                       |                                  |                                                 |
|  | 34350.1 | Putative Gene                                                                                       |                                  |                                                 |
|  | 24360.1 | Putative Gene                                                                                       | AP2 domain                       | Protein kinase                                  |
|  | 24370.1 | NADPH-hemoprotein reductase activity, iron ion binding, FAD binding, nitric-oxide synthase activity |                                  | NADPH-cytochrome P450 reductase                 |
|  | 24380.1 | Putative Gene                                                                                       | AUX/IAA family                   |                                                 |
|  | 24387.1 | Putative Gene                                                                                       | Sodium/calcium exchanger protein |                                                 |
|  | 24397.1 | Putative Gene                                                                                       | Transmembrane proteins 14C       |                                                 |
|  | 24410.1 | Putative Gene                                                                                       | Tify domain                      |                                                 |
|  | 24410.2 | Putative Gene                                                                                       | Tify domain                      |                                                 |
|  | 24420.1 | Aminoacyl-tRNA hydrolase activity                                                                   | Peptidyl-tRNA hydrolase PTH2     | Peptidyl-tRNA hydrolase 2                       |
|  | 24430.1 | Endonuclease activity                                                                               | S1/P1 nuclease                   |                                                 |
|  | 24430.2 | Endonuclease activity                                                                               | S1/P1 nuclease                   |                                                 |
|  | 24440.1 | Putative Gene                                                                                       |                                  |                                                 |
|  | 24450.1 | Protein kinase family protein, putative, expressed, subfamily RLCK-VI                               | Protein tyrosine kinase          |                                                 |
|  | 24460.1 | Putative Gene                                                                                       | Calmodulin binding protein-like  |                                                 |
|  | 24460.2 | Putative Gene                                                                                       | Calmodulin binding protein-like  |                                                 |

|  |         |                                                              |                                                                 |                                                |
|--|---------|--------------------------------------------------------------|-----------------------------------------------------------------|------------------------------------------------|
|  | 24460.3 | Putative Gene                                                | Calmodulin binding protein-like                                 |                                                |
|  | 24470.1 | Metalloendopeptidase activity                                | Mov34/MPN/PAD-1 family                                          | JUN activation domain binding protein          |
|  | 24480.1 | Protein kinase family protein, putative, subfamily, SD-2a    | Protein kinase domain                                           |                                                |
|  | 24490.1 | F-Box                                                        | F-Box                                                           |                                                |
|  | 24490.2 | F-Box                                                        | F-Box                                                           |                                                |
|  | 24490.3 | F-Box                                                        | F-Box                                                           |                                                |
|  | 24500.1 | Serine-type endopeptidase activity                           |                                                                 | Subtilisin/Kexin-related serine protease       |
|  | 24510.1 | Putative Gene                                                |                                                                 |                                                |
|  | 24520.1 | Serine-type endopeptidase activity                           | Peptidase inhibitor I9                                          | Subtilisin/Kexin-related serine protease       |
|  | 24530.1 | Protein serine/threonine phosphatase activity                | Protein phosphatase 2C                                          | Protein phosphatase 2c                         |
|  | 24536.1 | Putative Gene                                                |                                                                 |                                                |
|  | 24542.1 | Putative Gene                                                | Cupin superfamily protein                                       | MINA53 (MYC induced nuclear antigen)           |
|  | 24550.1 | Glutamate-ammonia ligase activity, ATP binding               | Glutamine synthetase                                            | Glutamine synthetase                           |
|  | 24550.2 | Glutamate-ammonia ligase activity, ATP binding               | Glutamine synthetase                                            | Glutamine synthetase                           |
|  | 24560.1 | Putative Gene                                                |                                                                 |                                                |
|  | 24570.1 | Protein kinase family protein, putative, subfamily, RLCK-OS1 | Protein kinase domain                                           |                                                |
|  | 24580.1 | Putative Gene                                                | Nucleolar protein, Nop52                                        | NNP-1 protein (novel nuclear protein 1, NOP52) |
|  | 24590.1 | ATP binding                                                  | ATPase family associated with various cellular activities (AAA) |                                                |
|  | 24600.1 | Putative Gene                                                |                                                                 |                                                |
|  | 24610.2 | Glucose-6-phosphate 1-epimerase activity                     | Aldose 1-epimerase                                              | Apospory-associated protein c-related          |
|  | 24610.3 | Glucose-6-phosphate 1-epimerase activity                     | Aldose 1-epimerase                                              | Apospory-associated protein c-related          |

|  |         |                                                                                                                            |                                                   |                                          |
|--|---------|----------------------------------------------------------------------------------------------------------------------------|---------------------------------------------------|------------------------------------------|
|  | 24610.4 | Glucose-6-phosphate 1-epimerase activity                                                                                   | Aldose 1-epimerase                                | Apospory-associated protein c-related    |
|  | 24620.1 | Putative Gene                                                                                                              |                                                   |                                          |
|  | 24630.1 | ATP binding                                                                                                                | Lipase (class 3)                                  | Alpha/beta hydrolase related             |
|  | 24640.1 | Protein farnesyltransferase activity                                                                                       | Polyprenyl synthetase                             | Farnesyl-prophosphate synthetase         |
|  | 24640.2 | Protein farnesyltransferase activity                                                                                       | Polyprenyl synthetase                             | Farnesyl-prophosphate synthetase         |
|  | 24650.1 | Putative Gene                                                                                                              | Peroxidase                                        |                                          |
|  | 24660.1 | Putative Gene                                                                                                              | Universal stress protein family                   |                                          |
|  | 24670.1 | Putative Gene                                                                                                              | SBP domain                                        |                                          |
|  | 24680.1 | Putative Gene                                                                                                              | Ribosomal protein<br>L7Ae/L30e/S12e/Gadd45 family | 60S Ribosomal protein 10A-related        |
|  | 24690.1 | Autoinhibited H+ P-type ATPase subfamily P3 cluster 2 from PMID:12805592. Similar to AtAHA1 plasma membrane H+ transporter |                                                   |                                          |
|  | 24700.1 | Putative Gene                                                                                                              | AP2 domain                                        |                                          |
|  | 24710.1 | Putative Gene                                                                                                              | AP2 domain                                        |                                          |
|  | 24720.1 | Putative Gene                                                                                                              | AP2 domain                                        |                                          |
|  | 24730.1 | Protein kinase activity                                                                                                    |                                                   |                                          |
|  | 24730.2 | Protein kinase activity                                                                                                    |                                                   |                                          |
|  | 24737.1 | Putative Gene                                                                                                              | Protein tyrosine kinase                           |                                          |
|  | 24750.1 | Protein kinase family protein, putative, expressed, subfamily RLCK-Os4                                                     | Protein tyrosine kinase                           |                                          |
|  | 24760.1 | Protein kinase family protein, putative, expressed, subfamily RLCK-Os4                                                     | Protein tyrosine kinase                           |                                          |
|  | 24770.1 | Putative Gene                                                                                                              |                                                   |                                          |
|  | 24780.1 | Serine-type endopeptidase activity                                                                                         |                                                   | Subtilisin/Kexin-related Serine protease |
|  | 24790.1 | BTB                                                                                                                        | BTB/POZ domain                                    |                                          |

|  |         |                                                                                                                                 |                                              |                                        |
|--|---------|---------------------------------------------------------------------------------------------------------------------------------|----------------------------------------------|----------------------------------------|
|  | 24800.1 | Neutral amino acid transmembrane transporter activity, L-amino acid transmembrane transporter activity                          | Transmembrane amino acid transporter protein | Amino acid transporter                 |
|  | 24810.1 | Neutral amino acid transmembrane transporter activity, L-amino acid transmembrane transporter activity                          | Transmembrane amino acid transporter protein | Amino acid transporter                 |
|  | 24820.1 | Endoribonuclease activity                                                                                                       | eRF1 domain                                  | PELOTA                                 |
|  | 24830.1 | Putative Gene                                                                                                                   |                                              |                                        |
|  | 24836.1 | Putative Gene                                                                                                                   | ABC1 family                                  | ABC transporter-related                |
|  | 24842.1 | Putative Gene                                                                                                                   |                                              |                                        |
|  | 24850.1 | Similar to UDP-arabinopyranose mutase. Reversibly glycosylated polypeptide. CAZy family GT75                                    | Reversibly glycosylated polypeptide          |                                        |
|  | 24860.1 | Putative Gene                                                                                                                   |                                              |                                        |
|  | 24870.1 | STE_MEKK_ste11_MAP3K.24 - STE kinases include homologs to sterile 7, sterile 11 and sterile 20 from yeast, expressed, subfamily | Protein kinase domain                        |                                        |
|  | 24870.2 | STE_MEKK_ste11_MAP3K.24 - STE kinases include homologs to sterile 7, sterile 11 and sterile 20 from yeast, expressed, subfamily | Protein kinase domain                        |                                        |
|  | 24870.3 | STE_MEKK_ste11_MAP3K.24 - STE kinases include homologs to sterile 7, sterile 11 and sterile 20 from yeast, expressed, subfamily | Protein kinase domain                        |                                        |
|  | 24880.1 | Putative Gene                                                                                                                   | Heavy-metal-associated domain                | Copper transport protein ATOX1-related |
|  | 24890.1 | Inositol pentakisphosphate 2-kinase activity, ATP binding                                                                       | Inositol-pentakisphosphate 2-kinase          | Inositol polyphosphate kinase 1        |
|  | 24900.1 | Putative Gene                                                                                                                   |                                              |                                        |
|  | 24900.3 | Putative Gene                                                                                                                   |                                              |                                        |
|  | 24910.1 | Putative Gene                                                                                                                   |                                              |                                        |
|  | 24917.1 | Putative Gene                                                                                                                   | Eukaryotic DNA topoisomerase I               | DNA topoisomerase Type 1               |

|  |         |                                    |                        |                                    |
|--|---------|------------------------------------|------------------------|------------------------------------|
|  | 24930.1 | Putative Gene                      |                        | Molybdopterin biosynthesis protein |
|  | 24930.3 | Putative Gene                      |                        | Molybdopterin biosynthesis protein |
|  | 24930.4 | Putative Gene                      |                        | Molybdopterin biosynthesis protein |
|  | 24937.1 | Putative Gene                      |                        |                                    |
|  | 24950.1 | Transcription coactivator activity | MED7 protein           |                                    |
|  | 24950.3 | Transcription coactivator activity | MED7 protein           |                                    |
|  | 24960.1 | 26S, subfamily 19S                 | Mov34/MPN/PAD-1 family | EIF3F-related                      |
|  | 24967.1 | Putative Gene                      | BSD domain             |                                    |
|  | 24980.1 | Putative Gene                      |                        | 40S Ribosomal protein S9           |



**Table S4** SIFT analysis of the changes produced by the SNP in *Bradi5g24290.1*.

| <b>Database</b> | <b>Predicted amino acid not tolerated</b> | <b>Number of sequences compared</b> | <b>Sequence represented</b> | <b>Predicted amino acid tolerated</b> |
|-----------------|-------------------------------------------|-------------------------------------|-----------------------------|---------------------------------------|
| SwissPort       | yvwtsrqpnmlki<br>hgfedc                   | 15                                  | 0.06                        | a                                     |
| TrEMBL          | whyfimqrndelc<br>kvtp                     | 54                                  | 0.16                        | gsa                                   |
| UniRef90        | whyfimqrndelc<br>kvtpg                    | 61                                  | 0.1                         | sa                                    |
| NCBI            | Whyfimqrndelk<br>cvtp                     | 72                                  | 0.15                        | gsa                                   |
